# Supplementary material for: Karydakis flap reconstruction versus Limberg flap transposition for pilonidal sinus disease: a meta-analysis of randomized controlled trials
Source: Springer Nature journal article supplement (doi:10.1007/s00423-018-1697-7), 2018-07-31
Supplement: MOESM1 [file 15991414]

| Study |  | |  | |
| --- | --- | --- | --- | --- |
| Study type |  | |  | |
| Origin |  | |  | |
| Time Period |  | |  | |
| Procedures |  |  |  |  |
| Patient Nr. |  | |  | |
| Age |  | |  | |
| Sex |  | |  | |
| BMI |  | |  | |
| ASA |  | |  | |
| Single-Shot |  | |  | |
| Methylene Blue |  | |  | |
| Drains |  | |  | |
| OP Time |  |  |  |  |
| Postop pain Score |  |  |  |  |
| Days of analgetics |  |  |  |  |
| Wound infection |  |  |  |  |
| Haemato/Seroma |  |  |  |  |
| Wound Dehiscence/Disruption |  |  |  |  |
| Maceration |  |  |  |  |
| Overall Morbidity |  |  |  |  |
| Length of stay |  |  |  |  |
| Re-operation |  |  |  |  |
| Follow up length |  |  |  |  |
| Recurrence |  |  |  |  |
| Time to recurrence |  |  |  |  |
| hypoesthesia |  |  |  |  |
| Previous surgical treatment (recurrence) |  |  |  |  |
| Pat. Satisfaction |  |  |  |  |
| Time to return to work |  |  |  |  |
| Time to wound healing |  |  |  |  |
| Type of anesthesia |  |  |  |  |
| **RISK OF BIAS (low,high,unclear)** | | | | |
| Random sequence generation |  | |  | |
| Allocation concealment |  | |  | |
| Blinding (participants & personnel) |  | |  | |
| Blinding of outcome assessment |  | |  | |
| Incomplete outcome data |  | |  | |
| Selective reporting |  | |  | |
| Other bias |  | |  | |
